# Supplementary material for: Instant water quality index (WQI) prediction via reaeration process and hydraulic parameters in the river system
Source: Research Square preprint supplement (doi:10.21203/rs.3.rs-7481412/v1), 2025-09-12
Supplement: Supplementary file 1 [file 7df2ce1dfaa0343470a8198e.docx]

**Table S1** The results of multivariate linear regression of re-aeration coefficient of Langbein and Durum relationship and ten independent variables

| R2 | 0.94 |
| --- | --- |
| sig | 2.36E-36 |
|  | Coefficient | standard error | T Student | Error probability coefficient | Checking the probability of error | Minimum amount of data | Maximum amount of data | standard deviation |
| constant | -19.41062744 | 7.450623852 | -2.605235189 | 0.01133438 |  |  |  |  |
| Q | 0.002082854 | 0.001480742 | 1.406628868 | 0.164228815 | Delete | 543.846 | 1716.293 | 291.398 |
| A | 0.002140211 | 0.001436372 | 1.490011528 | 0.140984879 | Delete | 209.898 | 1721.164 | 298.098 |
| S | -26.15604448 | 142.9589959 | -0.182961865 | 0.85538882 | Delete | 0.0001 | 0.005 | 0.002 |
| Re | -0.010186484 | 0.00221638 | -4.596000448 | 1.99817E-05 | OK | 78.425 | 932.857 | 210.18 |
| Fr | 48.20157807 | 2.421541705 | 19.90532641 | 1.34215E-29 | OK | 0.067 | 0.842 | 0.127 |
| T | 0.025089706 | 0.046348242 | 0.541330258 | 0.590102629 | Delete | 12.8 | 33 | 6 |
| TSS | 0.013803407 | 0.024582347 | 0.561517035 | 0.576346921 | Delete | 2 | 39 | 8.742 |
| Turbidity | -0.008794756 | 0.013956265 | -0.630165422 | 0.530762161 | Delete | 1 | 105 | 18.787 |
| EC | 0.001891493 | 0.000821197 | 2.303336833 | 0.02441871 | OK | 940 | 2530 | 348.761 |
| pH | 1.503658023 | 0.924605487 | 1.626269846 | 0.108658001 | Delete | 7.47 | 8.3 | 0.203 |

**Table S2** The results of multivariate linear regression of re-aeration coefficient of Langbein and Durum relationship and ten independent variables by removing low-effect data.

| R2 | 0.92 |
| --- | --- |
| sig | 1.086E-40 |
|  | Coefficient | standard error | T Student | Error probability coefficient | Checking the probability of error | Minimum amount of data | Maximum amount of data | standard deviation |
| constant | -4.749535549 | 1.593719322 | -2.980158101 | 0.003911183 |  |  |  |  |
| Re | -0.007511083 | 0.000995918 | -7.541869275 | 1.01848E-10 | OK | 78.425 | 932.857 | 210.18 |
| Fr | 44.80213961 | 1.811522632 | 24.73175814 | 3.22877E-37 | OK | 0.067 | 0.842 | 0.127 |
| EC | 0.002383816 | 0.00070916 | 3.36146319 | 0.001236495 | OK | 940 | 2530 | 348.761 |

**Table S3** results of multivariate linear regression of re-aeration coefficient of Langbein and Durum relationship and ten independent variables by removing outlier data

| R2 | 0.96 |
| --- | --- |
| sig | 2.42363E-29 |
|  | Coefficient | standard error | T Student | Error probability coefficient | Checking the probability of error | Minimum amount of data | Maximum amount of data | standard deviation |
| constant | -14.54672681 | 5.486459517 | -2.651386885 | 0.01016308 |  |  |  |  |
| Q | 0.000472269 | 0.00107529 | 0.439201743 | 0.662042309 | Delete | 543.846 | 1716.293 | 295.114 |
| A | -0.000672206 | 0.00114023 | -0.589535308 | 0.557644518 | Delete | 229.273 | 1721.164 | 294.546 |
| S | 43.45549678 | 105.541145 | 0.411739865 | 0.681950096 | Delete | 0.0001 | 0.005 | 0.002 |
| Re | -0.007536881 | 0.001610039 | -4.68117825 | 1.59749E-05 | OK | 78.425 | 932.857 | 211.366 |
| Fr | 33.09978346 | 2.90989712 | 11.37489818 | 8.13904E-17 | OK | 0.067 | 0.456 | 0.0936 |
| T | 0.025174049 | 0.033453147 | 0.752516615 | 0.454588128 | Delete | 12.8 | 33 | 5.81 |
| TSS | 0.010444401 | 0.018205999 | 0.573679068 | 0.568260267 | Delete | 2 | 39 | 8.509 |
| Turbidity | -0.01362798 | 0.009954419 | -1.369038176 | 0.17592681 | Delete | 1 | 105 | 19.081 |
| EC | 0.001584103 | 0.000595247 | 2.661251917 | 0.009900185 | OK | 940 | 2530 | 348.307 |
| PH | 1.633970615 | 0.664602533 | 2.45856814 | 0.016755605 | Delete | 7.47 | 8.3 | 0.205 |

**Table S4** The results of the multivariate linear regression of the re-aeration coefficient of the Langbein and Durum relationship and ten independent variables by removing outliers and low-effect data

| R2 | 0.91 |
| --- | --- |
| sig | 7.86507E-35 |
|  | Coefficient | standard error | T Student | Error probability coefficient | Checking the probability of error | Minimum amount of data | Maximum amount of data | standard deviation |
| constant | -15.19661434 | 5.1030233 | -2.977962955 | 0.004018655 |  |  |  |  |
| Re | -0.007016018 | 0.000661902 | -10.59978412 | 4.78726E-16 | OK | 78.425 | 932.857 | 211.366 |
| Fr | 34.727224 | 1.665518466 | 20.85069887 | 2.97827E-31 | OK | 0.067 | 0.456 | 0.0936 |
| EC | 0.001269332 | 0.000490719 | 2.586678735 | 0.011834744 | OK | 940 | 2530 | 348.307 |
| pH | 1.786325074 | 0.621422903 | 2.874572315 | 0.00539564 | OK | 7.47 | 8.3 | 0.205 |

**Table S5** results of multivariate linear regression of re-aeration coefficient of Ice and Brown relationship and ten independent variables

| R2 | 0.945 |
| --- | --- |
| sig | 1.50247E-37 |
|  | Coefficient | standard error | T Student | Error probability coefficient | Checking the probability of error | Minimum amount of data | Maximum amount of data | standard deviation |
| constant | -16.60979139 | 7.510098742 | -2.211660853 | 0.030457681 |  |  |  |  |
| Q | 0.002780889 | 0.001492562 | 1.863165261 | 0.066889396 | Delete | 543.846 | 1716.293 | 291.398 |
| A | -0.003895607 | 0.001447838 | -2.690637411 | 0.00902473 | OK | 209.898 | 1721.164 | 298.098 |
| S | 2123.373513 | 144.1001716 | 14.73539892 | 1.49813E-22 | OK | 0.0001 | 0.005 | 0.002 |
| Re | -0.00692034 | 0.002234073 | -3.097634438 | 0.002864245 | OK | 78.425 | 932.857 | 210.18 |
| Fr | 26.60909602 | 2.440871754 | 10.90147238 | 2.1061E-16 | OK | 0.067 | 0.842 | 0.127 |
| T | 0.007154669 | 0.046718219 | 0.153145149 | 0.878751076 | Delete | 12.8 | 33 | 6 |
| TSS | -0.02919161 | 0.024778577 | -1.178098732 | 0.242987634 | Delete | 2 | 39 | 8.742 |
| Turbidity | -0.01299441 | 0.014067672 | -0.923707229 | 0.359003587 | Delete | 1 | 105 | 18.787 |
| EC | 0.003466304 | 0.000827752 | 4.187610807 | 8.5341E-05 | OK | 940 | 2530 | 348.761 |
| PH | 1.407150916 | 0.931986186 | 1.509840959 | 0.135856923 | Delete | 7.47 | 8.3 | 0.203 |

**Table S6** results of multivariate linear regression of re-aeration coefficient of ice and brown relationship and ten independent variables by removing low effect data

| R2 | 0.94 |
| --- | --- |
| sig | 2.60589E-41 |
|  | Coefficient | standard error | T Student | Error probability coefficient | Checking the probability of error | Minimum amount of data | Maximum amount of data | standard deviation |
| constant | -4.702407516 | 1.626128714 | -2.89178063 | 0.005080609 |  |  |  |  |
| A | -0.002447457 | 0.001097987 | -2.229040371 | 0.028977233 | OK | 209.898 | 1721.164 | 298.098 |
| S | 2300.455428 | 122.9915819 | 18.70416978 | 3.77576E-29 | OK | 0.0001 | 0.005 | 0.002 |
| Re | -0.003315202 | 0.00106466 | -3.113859205 | 0.002662162 | OK | 78.425 | 932.857 | 210.18 |
| Fr | 27.10665556 | 2.382488609 | 11.37745442 | 1.16214E-17 | OK | 0.067 | 0.842 | 0.127 |
| EC | 0.002464991 | 0.000744243 | 3.312079613 | 0.001458768 | OK | 940 | 2530 | 348.761 |

**Table S7** results of multivariate linear regression of re-aeration coefficient of Ice and Brown relationship and ten independent variables by removing outlier data

| R2 | 0.94 |
| --- | --- |
| sig | 5.44453E-35 |
|  | Coefficient | standard error | T Student | Error probability coefficient | Checking the probability of error | Minimum amount of data | Maximum amount of data | standard deviation |
| constant | -13.99652588 | 7.131536928 | -1.962624049 | 0.053972686 |  |  |  |  |
| Q | 0.001927884 | 0.001434648 | 1.343803464 | 0.183684125 | Delete | 543.846 | 1716.293 | 293.036 |
| A | -0.005042304 | 0.001415878 | -3.561255029 | 0.000696578 | OK | 209.898 | 1721.164 | 297.205 |
| S | 2177.287849 | 136.9911653 | 15.89363697 | 4.46795E-24 | OK | 0.0001 | 0.005 | 0.002 |
| Re | -0.005713147 | 0.00214304 | -2.665908183 | 0.009676625 | OK | 78.425 | 932.857 | 210.952 |
| Fr | 20.23767702 | 3.110347355 | 6.50656493 | 1.27914E-08 | OK | 0.067 | 0.575 | 0.107 |
| T | -0.007844105 | 0.04431547 | -0.177006017 | 0.860054064 | Delete | 12.8 | 33 | 5.97 |
| TSS | -0.035990553 | 0.023465016 | -1.533796259 | 0.129933095 | Delete | 2 | 39 | 8.652 |
| Turbidity | -0.013902449 | 0.013264801 | -1.048070735 | 0.298487557 | Delete | 1 | 105 | 18.854 |
| EC | 0.003230374 | 0.000784152 | 4.119576877 | 0.000109511 | OK | 940 | 2530 | 350.149 |
| PH | 1.472732928 | 0.878837663 | 1.67577357 | 0.0985869 | Delete | 7.47 | 8.3 | 0.204 |

**Table S8** results of multivariate linear regression of re-aeration coefficient of Ice and Brown relationship and ten independent variables by removing outlier and low effect data

| R2 | 0.93 |
| --- | --- |
| sig | 1.48551E-38 |
|  | Coefficient | standard error | T Student | Error probability coefficient | Checking the probability of error | Minimum amount of data | Maximum amount of data | standard deviation |
| constant | -1.836239545 | 1.788682582 | -1.026587704 | 0.308149101 |  |  |  |  |
| A | -0.004173271 | 0.001174653 | -3.55276799 | 0.000687278 | OK | 209.898 | 1721.164 | 297.205 |
| S | 2325.591767 | 116.3445813 | 19.98882751 | 1.20589E-30 | OK | 0.0001 | 0.005 | 0.002 |
| Re | -0.003219451 | 0.001005171 | -3.202888105 | 0.002048391 | OK | 78.425 | 932.857 | 210.952 |
| Fr | 20.25603647 | 3.14319757 | 6.44440447 | 1.26585E-08 | OK | 0.067 | 0.575 | 0.107 |
| EC | 0.002206884 | 0.000707188 | 3.120644126 | 0.002621562 | OK | 940 | 2530 | 350.149 |

**Table S9** results of multivariate linear regression of Cadwallader and McDonnell re-aeration coefficient and ten independent variables

| *R2* | *0.90* |
| --- | --- |
| *sig* | 3.62095E-29 |
|  | Coefficient | standard error | T Student | Error probability coefficient | Checking the probability of error | Minimum amount of data | Maximum amount of data | standard deviation |
| constant | -38.99079118 | 16.68911166 | -2.336301175 | 0.022521975 |  |  |  |  |
| Q | 0.006090658 | 0.003316805 | 1.836302734 | 0.070817129 | Delete | 543.846 | 1716.293 | 291.398 |
| A | -0.005540439 | 0.003217418 | -1.722014139 | 0.089750784 | Delete | 209.898 | 1721.164 | 298.098 |
| S | 2627.678422 | 320.2226677 | 8.205785184 | 1.13402E-11 | OK | 0.0001 | 0.005 | 0.002 |
| Re | -0.018418519 | 0.004964607 | -3.709965353 | 0.000427367 | OK | 78.425 | 932.857 | 210.18 |
| Fr | 49.16606109 | 5.42416054 | 9.064271001 | 3.34423E-13 | OK | 0.067 | 0.842 | 0.127 |
| T | 0.036123105 | 0.103818285 | 0.347945502 | 0.728988421 | Delete | 12.8 | 33 | 6 |
| TSS | -0.043143873 | 0.055063515 | -0.783529218 | 0.436119192 | Delete | 2 | 39 | 8.742 |
| Turbidity | -0.028948881 | 0.031261499 | -0.926023432 | 0.3578076 | Delete | 1 | 105 | 18.787 |
| EC | 0.007000998 | 0.001839449 | 3.806028898 | 0.000311663 | OK | 940 | 2530 | 348.761 |
| PH | 3.409459259 | 2.071080827 | 1.646222211 | 0.104472183 | Delete | 7.47 | 8.3 | 0.203 |

**Table S10** the results of multivariate linear regression of re-aeration coefficient of Cadwallader and McDonnell relationship and ten independent variables by removing low-effect data.

| R2 | 0.87 |
| --- | --- |
| sig | 2.81278E-33 |
|  | Coefficient | standard error | T Student | Error probability coefficient | Checking the probability of error | Minimum amount of data | Maximum amount of data | standard deviation |
| constant | -10.88196633 | 3.472004981 | -3.134202394 | 0.002493444 |  |  |  |  |
| S | 2938.634702 | 259.3534129 | 11.33061898 | 1.15397E-17 | OK | 0.0001 | 0.005 | 0.002 |
| Re | -0.01090636 | 0.002297581 | -4.746888108 | 1.02099E-05 | OK | 78.425 | 932.857 | 210.18 |
| Fr | 53.93178308 | 3.894323924 | 13.84881795 | 5.46374E-22 | OK | 0.067 | 0.842 | 0.127 |
| EC | 0.00435055 | 0.001519037 | 2.864019182 | 0.005476991 | OK | 940 | 2530 | 348.761 |

**Table S11** the results of multivariate linear regression of re-aeration coefficient of Cadwallader and McDonnell relationship and ten independent variables by removing outlier data

| R2 | 0.89 |
| --- | --- |
| sig | 1.94411E-25 |
|  | Coefficient | standard error | T Student | Error probability coefficient | Checking the probability of error | Minimum amount of data | Maximum amount of data | standard deviation |
| constant | -19.72954962 | 13.98364721 | -1.410901557 | 0.163271815 |  |  |  |  |
| Q | 0.003090644 | 0.002672621 | 1.156409421 | 0.251950227 | Delete | 543.846 | 1716.293 | 293.301 |
| A | -0.009361828 | 0.002647669 | -3.535875349 | 0.000775424 | OK | 209.898 | 1721.164 | 298.356 |
| S | 2693.867517 | 257.0739967 | 10.47895762 | 2.37246E-15 | OK | 0.0001 | 0.005 | 0.002 |
| Re | -0.013131569 | 0.004004593 | -3.279126889 | 0.001710211 | OK | 78.425 | 932.857 | 206.995 |
| Fr | 25.55043251 | 6.133430235 | 4.165765572 | 9.77344E-05 | OK | 0.067 | 0.575 | 0.102 |
| T | 0.085961626 | 0.0833172 | 1.031739255 | 0.306202266 | Delete | 12.8 | 33 | 5.77 |
| TSS | -0.038376257 | 0.044341298 | -0.86547436 | 0.390115125 | Delete | 2 | 39 | 8.706 |
| Turbidity | -0.029283006 | 0.024709511 | -1.185090451 | 0.240504334 | Delete | 1 | 105 | 19.065 |
| EC | 0.005579832 | 0.001516163 | 3.680232943 | 0.000489999 | OK | 940 | 2530 | 351.054 |
| PH | 2.0723122 | 1.716568669 | 1.207241072 | 0.231924902 | Delete | 7.47 | 8.3 | 0.201 |

**Table S12** results of multivariate linear regression of re-aeration coefficient of Cadwallader and McDonnell relationship and ten independent variables by removing outlier and low effect data

| R2 | 0.87 |
| --- | --- |
| sig | 8.02115E-29 |
|  | Coefficient | standard error | T Student | Error probability coefficient | Checking the probability of error | Minimum amount of data | Maximum amount of data | standard deviation |
| constant | -0.774922818 | 3.31028292 | -0.234095646 | 0.815624582 |  |  |  |  |
| A | -0.007965406 | 0.002183384 | -3.648191988 | 0.000517637 | OK | 209.898 | 1721.164 | 298.356 |
| S | 3009.993198 | 212.2438548 | 14.18176842 | 7.44705E-22 | OK | 0.0001 | 0.005 | 0.002 |
| Re | -0.007793894 | 0.001868479 | -4.171251471 | 8.90705E-05 | OK | 78.425 | 932.857 | 206.995 |
| Fr | 24.14801282 | 6.115212016 | 3.948843107 | 0.000191118 | OK | 940 | 2530 | 351.054 |
| EC | 0.004057171 | 0.001302067 | 3.115946117 | 0.002699311 | OK | 7.47 | 8.3 | 0.201 |

**Table S13** results of multivariate linear regression of Dobbins re-aeration coefficient and ten independent variables

| R2 | 0.79 |
| --- | --- |
| sig | 5.89206E-19 |
|  | Coefficient | standard error | T Student | Error probability coefficient | Checking the probability of error | Minimum amount of data | Maximum amount of data | standard deviation |
| constant | -78.51657159 | 55.20264134 | -1.4223336 | 0.159638511 |  |  |  |  |
| Q | 0.016868348 | 0.010971009 | 1.53753844 | 0.128942195 | Delete | 543.846 | 1716.293 | 291.398 |
| A | -0.033753118 | 0.010642267 | -3.17160993 | 0.002300713 | OK | 209.898 | 1721.164 | 298.098 |
| S | 451.9485512 | 1059.201798 | 0.426687863 | 0.670995306 | Delete | 0.0001 | 0.005 | 0.002 |
| Re | -0.098974111 | 0.016421449 | -6.02712398 | 8.31481E-08 | OK | 78.425 | 932.857 | 210.18 |
| Fr | 27.00629429 | 17.9415175 | 1.50524025 | 0.137033362 | Delete | 0.067 | 0.842 | 0.127 |
| T | 0.5217036 | 0.343400156 | 1.519229362 | 0.133480989 | Delete | 12.8 | 33 | 6 |
| TSS | -0.055538372 | 0.182133808 | -0.304931704 | 0.761377706 | Delete | 2 | 39 | 8.742 |
| Turbidity | -0.01516259 | 0.103403786 | -0.146634767 | 0.883867294 | Delete | 1 | 105 | 18.787 |
| EC | 0.024261627 | 0.006084354 | 3.987543379 | 0.000169647 | OK | 940 | 2530 | 348.761 |
| PH | 14.89667591 | 6.850522331 | 2.174531398 | 0.033254867 | OK | 7.47 | 8.3 | 0.203 |

**Table S14** The results of multivariate linear regression of Dobbins relation re-aeration coefficient and ten independent variables by removing low effect data

| R2 | 0.76 |
| --- | --- |
| sig | 2.1282E-21 |
|  | Coefficient | standard error | T Student | Error probability coefficient | Checking the probability of error | Minimum amount of data | Maximum amount of data | standard deviation |
| constant | -76.75181176 | 55.42575293 | -1.384768049 | 0.170399636 |  |  |  |  |
| A | -0.029170968 | 0.005982626 | -4.875947429 | 6.26567E-06 | OK | 209.898 | 1721.164 | 298.098 |
| Re | -0.078958386 | 0.007165657 | -11.01900106 | 4.16398E-17 | OK | 78.425 | 932.857 | 210.18 |
| EC | 0.021350473 | 0.005546966 | 3.849035879 | 0.000254261 | OK | 940 | 2530 | 348.761 |
| pH | 18.30541862 | 6.807207914 | 2.68912289 | 0.008896178 | OK | 7.47 | 8.3 | 0.203 |

**Table S15** results of multivariate linear regression of re-aeration coefficient of Dobbins relationship and ten independent variables by removing outlier data

| R2 | 0.86 |
| --- | --- |
| sig | 4.0545E-22 |
|  | Coefficient | standard error | T Student | Error probability coefficient | Checking the probability of error | Minimum amount of data | Maximum amount of data | standard deviation |
| constant | 41.54186771 | 34.28147755 | 1.211787551 | 0.230266861 |  |  |  |  |
| Q | 0.000702578 | 0.006379622 | 0.110128439 | 0.912669037 | Delete | 543.846 | 1716.293 | 287.166 |
| A | -0.010289471 | 0.006431112 | -1.599951961 | 0.114776275 | Delete | 209.898 | 1721.164 | 308.046 |
| S | 822.664407 | 602.9495895 | 1.364399979 | 0.177454329 | Delete | 0.0001 | 0.005 | 0.002 |
| Re | -0.066517585 | 0.009721572 | -6.842266412 | 4.32228E-09 | OK | 78.425 | 932.857 | 195.531 |
| Fr | 42.90781543 | 10.24712931 | 4.18730106 | 9.22725E-05 | OK | 0.067 | 0.842 | 0.131 |
| T | 0.511831008 | 0.196932725 | 2.599014498 | 0.011708118 | OK | 12.8 | 33 | 5.99 |
| TSS | -0.098783192 | 0.106199488 | -0.930166369 | 0.355951534 | Delete | 2 | 39 | 8.614 |
| Turbidity | 0.121646498 | 0.060265532 | 2.018508668 | 0.047940878 | OK | 1 | 105 | 19.26 |
| EC | 0.001093957 | 0.004189584 | 0.261113425 | 0.794884596 | Delete | 940 | 2530 | 324.348 |
| PH | 1.310062548 | 4.213776102 | 0.310899895 | 0.756936652 | Delete | 7.47 | 8.3 | 0.2 |

**Table S16** the results of multivariate linear regression of re-aeration coefficient of Dobbins relationship and ten independent variables by removing outlier and low effect data

| R2 | 0.84 |
| --- | --- |
| sig | 4.84313E-26 |
|  | Coefficient | standard error | T Student | Error probability coefficient | Checking the probability of error | Minimum amount of data | Maximum amount of data | standard deviation |
| constant | 43.85462835 | 4.320064251 | 10.15138336 | 3.47682E-15 |  |  |  |  |
| Re | -0.069398265 | 0.004393214 | -15.79669578 | 2.79642E-24 | OK | 78.425 | 932.857 | 195.531 |
| Fr | 58.88688293 | 6.932563165 | 8.49424398 | 3.09619E-12 | OK | 0.067 | 0.842 | 0.131 |
| T | 0.647450186 | 0.15996693 | 4.047400198 | 0.000136622 | OK | 12.8 | 33 | 5.99 |
| Turbidity | 0.072269739 | 0.049966091 | 1.446375688 | 0.152734012 | OK | 1 | 105 | 19.26 |

**Table S17** The results of multivariate linear regression of re-aeration coefficient of Dobbins relationship and ten independent variables by removing outliers and low effect data

| R2 | 0.84 |
| --- | --- |
| sig | 1.14717E-26 |
|  | Coefficient | standard error | T Student | Error probability coefficient | Checking the probability of error | Minimum amount of data | Maximum amount of data | standard deviation |
| constant | 44.90613555 | 4.292511208 | 10.46150688 | 8.36642E-16 |  |  |  |  |
| Re | -0.071560987 | 0.004163957 | -17.18581487 | 1.91347E-26 | OK | 78.425 | 932.857 | 195.531 |
| Fr | 55.50539962 | 6.57865276 | 8.437198565 | 3.52344E-12 | OK | 0.067 | 0.842 | 0.131 |
| T | 0.731953664 | 0.150107103 | 4.876209391 | 6.81402E-06 | OK | 12.8 | 33 | 5.99 |

**Table S18** results of the clustering of Langbein and Durum relationship with ten variables

|  | Cluster 1 | Cluster 2 |
| --- | --- | --- |
| K21 | 2.70 | 2.24 |
| Q | 543.85 | 1493.81 |
| A | 955.84 | 776.08 |
| S | 0.0040 | 0.0001 |
| Re | 78.43 | 660.94 |
| Fr | 0.08 | 0.17 |
| T | 26.30 | 21.40 |
| TSS | 15.00 | 5.00 |
| Turbidity | 105.00 | 1.00 |
| EC | 2530.00 | 1089.00 |
| PH | 7.85 | 8.05 |

**Table S19** the results of the regression of the Langbein and Durum relationship with the variables placed in a cluster

| R2 | 0.54 |
| --- | --- |
| sig | 3.6917E-10 |
|  | Coefficient | standard error | T Student | Error probability coefficient | Checking the probability of error | Minimum amount of data | Maximum amount of data | standard deviation |
| constant | 12.42670547 | 3.450818415 | 3.601089357 | 0.000588002 |  |  |  |  |
| A | -0.011161946 | 0.002243816 | -4.974537339 | 4.49248E-06 | OK | 209.898 | 1721.164 | 298.098 |
| S | 1254.897054 | 278.2807974 | 4.509463339 | 2.54857E-05 | OK | 0.0001 | 0.005 | 0.002 |
| T | -0.191231754 | 0.103895777 | -1.840611426 | 0.069917022 | Delete | 12.8 | 33 | 6 |
| TSS | 0.078647853 | 0.06512709 | 1.20760583 | 0.231263358 | Delete | 2 | 39 | 8.742 |
| Turbidity | 0.011577681 | 0.036179847 | 0.320003581 | 0.749918823 | Delete | 1 | 105 | 18.787 |
| EC | 0.00026927 | 0.002029679 | 0.132666377 | 0.894837861 | Delete | 940 | 2530 | 348.761 |

**Table S20** results from the regression of the Langbein and Durum relationship with the variables placed in a cluster after removing the low effect variable.

| R2 | 0.47 |
| --- | --- |
| sig | 4.71398E-11 |
|  | Coefficient | standard error | T Student | Error probability coefficient | Checking the probability of error | Minimum amount of data | Maximum amount of data | standard deviation |
| constant | 10.70353076 | 1.270429596 | 8.425127054 | 2.03252E-12 |  |  |  |  |
| A | -0.012525456 | 0.001669477 | -7.50262389 | 1.12414E-10 | OK | 209.898 | 1721.164 | 298.098 |
| S | 1203.257929 | 284.0496101 | 4.23608372 | 6.46753E-05 | OK | 0.0001 | 0.005 | 0.002 |

**Table S21** results of Ice and Brown relationship clustering with ten variables

|  | Cluster 1 | Cluster 2 |
| --- | --- | --- |
| K22 | 10.45 | 6.82 |
| Q | 543.85 | 1493.81 |
| A | 955.84 | 776.08 |
| S | 0.004 | 0.0001 |
| Re | 78.43 | 660.94 |
| Fr | 0.08 | 0.17 |
| T | 26.30 | 21.40 |
| TSS | 15.00 | 5.00 |
| Turbidity | 105.00 | 1.00 |
| EC | 2530.00 | 1089.00 |
| PH | 7.85 | 8.05 |

**Table S22** results from the regression of Ice and Brown relationship with the variables placed in a cluster

| R2 | 0.83 |
| --- | --- |
| sig | 7.21395E-25 |
|  | Coefficient | standard error | T Student | Error probability coefficient | Checking the probability of error | Minimum amount of data | Maximum amount of data | standard deviation |
| constant | 6.479113527 | 2.209887858 | 2.93187435 | 0.004548999 |  |  |  |  |
| A | -0.010267269 | 0.001436929 | -7.145285196 | 6.78291E-10 | OK | 209.898 | 1721.164 | 298.098 |
| S | 2879.306859 | 178.2097118 | 16.15684594 | 2.57199E-25 | OK | 0.0001 | 0.005 | 0.002 |
| T | -0.113376752 | 0.066534366 | -1.70403295 | 0.092810515 | Delete | 12.8 | 33 | 6 |
| TSS | 0.008634414 | 0.041707081 | 0.207025127 | 0.836591285 | Delete | 2 | 39 | 8.742 |
| Turbidity | -0.006520695 | 0.023169404 | -0.281435612 | 0.779206595 | Delete | 1 | 105 | 18.787 |
| EC | 0.002217857 | 0.001299797 | 1.706310287 | 0.092383582 | Delete | 940 | 2530 | 348.761 |

### **Table S23** regression results from Ice and Brown's relationship with variables placed in a cluster after removing low-effect variables

| R2 | 0.81 |
| --- | --- |
| sig | 3.7112E-27 |
|  | Coefficient | standard error | T Student | Error probability coefficient | Checking the probability of error | Minimum amount of data | Maximum amount of data | standard deviation |
| constant | 6.9886191 | 0.809173313 | 8.636739484 | 8.08375E-13 |  |  |  |  |
| A | -0.009946112 | 0.001063338 | -9.353670073 | 3.58353E-14 | OK | 209.898 | 1721.164 | 298.098 |
| S | 2903.004343 | 180.919403 | 16.04584304 | 8.39982E-26 | OK | 0.0001 | 0.005 | 0.002 |

**Table S24** results of the clustering of Cadwallader and McDonnell relationship with ten variables

|  | Cluster 1 | Cluster 2 |
| --- | --- | --- |
| K23 | 14.87 | 6.83 |
| Q | 543.85 | 1493.81 |
| A | 955.84 | 776.08 |
| S | 0.0040 | 0.0001 |
| Re | 78.43 | 660.94 |
| Fr | 0.08 | 0.17 |
| T | 26.30 | 21.40 |
| TSS | 15.00 | 5.00 |
| Turbidity | 105.00 | 1.00 |
| EC | 2530.00 | 1089.00 |
| PH | 7.85 | 8.05 |

**Table S25** the results of the regression of the relationship of Cadwallader and McDonnell with the variables placed in a cluster

| R2 | 0.74 |
| --- | --- |
| sig | 1.22175E-18 |
|  | Coefficient | standard error | T Student | Error probability coefficient | Checking the probability of error | Minimum amount of data | Maximum amount of data | standard deviation |
| constant | 8.226769547 | 4.50056665 | 1.827940832 | 0.071819882 |  |  |  |  |
| A | -0.017261132 | 0.002926391 | -5.898437029 | 1.18269E-07 | OK | 209.898 | 1721.164 | 298.098 |
| S | 4313.929565 | 362.9345637 | 11.88624616 | 1.8641E-18 | OK | 0.0001 | 0.005 | 0.002 |
| T | -0.266884389 | 0.135501152 | -1.969609747 | 0.052841358 | Delete | 12.8 | 33 | 6 |
| TSS | 0.024523254 | 0.084938925 | 0.288716322 | 0.773651736 | Delete | 2 | 39 | 8.742 |
| TUR | -0.009650989 | 0.047185854 | -0.204531413 | 0.838531777 | Delete | 1 | 105 | 18.787 |
| EC | 0.005537585 | 0.002647113 | 2.091933485 | 0.040073228 | OK | 940 | 2530 | 348.761 |

**Table S26** the results of the regression of the relationship of Cadwallader and McDonnell with the variables placed in a cluster after removing the less effective variables.

| R2 | 0.72 |
| --- | --- |
| sig | 6.59137E-20 |
|  | Coefficient | standard error | T Student | Error probability coefficient | Checking the probability of error | Minimum amount of data | Maximum amount of data | standard deviation |
| constant | 4.003854635 | 2.878625158 | 1.390891282 | 0.168483622 |  |  |  |  |
| A | -0.020135052 | 0.002713119 | -7.421367135 | 1.71119E-10 | OK | 209.898 | 1721.164 | 298.098 |
| S | 4260.491633 | 368.5491182 | 11.56017318 | 3.68524E-18 | OK | 0.0001 | 0.005 | 0.002 |
| EC | 0.00570152 | 0.002337186 | 2.439481024 | 0.017138543 | OK | 940 | 2530 | 348.761 |

**Table S27** results of clustering of Dobbins relationship with ten variables

|  | Cluster 1 | Cluster 2 |
| --- | --- | --- |
| K24 | 84.19 | 26.03 |
| Q | 543.85 | 1493.81 |
| A | 955.84 | 776.08 |
| S | 0.0040 | 0.0001 |
| Re | 78.43 | 660.94 |
| Fr | 0.08 | 0.17 |
| T | 26.30 | 21.40 |
| TSS | 15.00 | 5.00 |
| Turbidity | 105.00 | 1.00 |
| EC | 2530.00 | 1089.00 |
| PH | 7.85 | 8.05 |

**Table S28** the results of the regression of Dobbins relationship with the variables placed in a cluster

| R2 | 0.53 |
| --- | --- |
| sig | 7.39856E-10 |
|  | Coefficient | standard error | T Student | Error probability coefficient | Checking the probability of error | Minimum amount of data | Maximum amount of data | standard deviation |
| constant | 19.77305355 | 13.94254623 | 1.418180957 | 0.1605746 |  |  |  |  |
| A | -0.040395501 | 0.009065823 | -4.455800951 | 3.09806E-05 | OK | 209.898 | 1721.164 | 298.098 |
| S | 5985.11376 | 1124.354404 | 5.323155883 | 1.16868E-06 | OK | 0.0001 | 0.005 | 0.002 |
| T | -0.926701355 | 0.263136842 | -0.205227915 | 0.030550909 | OK | 12.8 | 33 | 6 |
| TSS | -0.054003025 | 0.146179581 | 0.806139422 | 0.83798969 | Delete | 2 | 39 | 8.742 |
| TUR | 0.117841123 | 0.008200634 | 4.542930699 | 0.422892709 | Delete | 1 | 105 | 18.787 |
| EC | 0.037254912 | 0.263136842 | -0.205227915 | 2.25513E-05 | OK | 940 | 2530 | 348.761 |

### **Table S29** the results of the regression of Dobbins' relationship with the variables placed in a cluster after removing the less effective variables.

| R2 | 0.52 |
| --- | --- |
| sig | 4.97685E-11 |
|  | Coefficient | standard error | T Student | Error probability coefficient | Checking the probability of error | Minimum amount of data | Maximum amount of data | standard deviation |
| constant | 13.4881511 | 10.64845073 | 1.266677327 | 0.209353075 |  |  |  |  |
| A | -0.038853658 | 0.008755082 | -4.437840674 | 3.20662E-05 | OK | 209.898 | 1721.164 | 298.098 |
| S | 5964.963536 | 1106.095445 | 5.392810868 | 8.40298E-07 | OK | 0.0001 | 0.005 | 0.002 |
| T | -0.80773829 | 0.352554833 | -2.291099754 | 0.024886618 | OK | 12.8 | 33 | 6 |
| EC | 0.039894659 | 0.007010605 | 5.690615842 | 2.55266E-07 | OK | 940 | 2530 | 348.761 |

**Table S30** results of multivariate linear regression of re-aeration coefficient of Langbein and Durumrelationship and ten independent variables with autumn and winter season data

| R2 | 0.97 |
| --- | --- |
| sig | 3.58672E-16 |
|  | Coefficient | standard error | T Student | Error probability coefficient | Checking the probability of error | Minimum amount of data | Maximum amount of data | standard deviation |
| constant | 5.699004464 | 17.46641797 | 0.326283527 | 0.747038046 |  |  |  |  |
| Q | 0.002558171 | 0.002320207 | 1.102561572 | 0.281151497 | Delete | 543.846 | 1716.293 | 320.731 |
| A | 0.004542322 | 0.003020767 | 1.503697985 | 0.145705568 | Delete | 209.898 | 1079.629 | 251.95 |
| S | -130.0390685 | 214.1069778 | -0.607355584 | 0.549318843 | Delete | 0.0001 | 0.005 | 0.002 |
| Re | -0.015193087 | 0.003723071 | -4.080794217 | 0.000429519 | OK | 78.425 | 905.834 | 201.98 |
| Fr | 56.07127084 | 3.528044625 | 15.89301633 | 3.06185E-14 | OK | 0.083 | 0.842 | 0.156 |
| T | 0.056737065 | 0.11587539 | 0.48963861 | 0.628835343 | Delete | 12.8 | 26.3 | 4.5 |
| TSS | -0.011953363 | 0.037984645 | -0.314689339 | 0.755717099 | Delete | 6 | 39 | 9.302 |
| Turbidity | -0.044219113 | 0.023191228 | -1.906717222 | 0.068598132 | Delete | 2 | 105 | 17.82 |
| EC | 0.004084619 | 0.001406912 | 2.90325171 | 0.007800322 | OK | 940 | 25.3 | 329.566 |
| pH | -2.295398269 | 2.376544359 | -0.965855428 | 0.343749033 | Delete | 7.58 | 8.3 | 0.162 |

**Table S31** results of multivariate linear regression of re-aeration coefficient of Langbein and Durumrelationship and ten independent variables with fall and winter season data after removing low effective data

| R2 | 0.95 |
| --- | --- |
| sig | 3.03858E-20 |
|  | Coefficient | standard error | T Student | Error probability coefficient | Checking the probability of error | Minimum amount of data | Maximum amount of data | standard deviation |
| constant | -7.778850052 | 2.471159412 | -3.14785441 | 0.003622653 |  |  |  |  |
| Re | -0.00944626 | 0.001601802 | -5.897269255 | 1.64421E-06 | OK | 78.425 | 905.834 | 201.98 |
| Fr | 49.90667409 | 2.457882099 | 20.30474697 | 1.81999E-19 | OK | 0.083 | 0.842 | 0.156 |
| EC | 0.00398817 | 0.001182619 | 3.372320738 | 0.002013703 | OK | 940 | 25.3 | 329.566 |

**Table S32** results of multivariate linear regression of re-aeration coefficient of Langbein and Durumrelationship and ten independent variables with spring and summer season data

| R2 | 0.94 |
| --- | --- |
| sig | 7.25628E-16 |
|  | Coefficient | standard error | T Student | Error probability coefficient | Checking the probability of error | Minimum amount of data | Maximum amount of data | standard deviation |
| constant | -5.837245817 | 7.236332536 | -0.806658039 | 0.426009144 |  |  |  |  |
| Q | -0.000733287 | 0.001382174 | -0.530531714 | 0.599523627 | Delete | 607.412 | 1560.908 | 267.189 |
| A | -0.000913573 | 0.001140366 | -0.801122246 | 0.429158714 | Delete | 229.273 | 1721.164 | 329.721 |
| S | 219.7811255 | 143.0663012 | 1.536218687 | 0.13462965 | Delete | 0.0001 | 0.005 | 0.002 |
| Re | -0.004245741 | 0.001877492 | -2.261389416 | 0.030897567 | OK | 89.558 | 932.857 | 211.841 |
| Fr | 29.39374826 | 3.46731822 | 8.477372537 | 1.41586E-09 | OK | 0.067 | 0.456 | 0.094 |
| T | -0.028744607 | 0.062984837 | -0.456373436 | 0.651302938 | Delete | 18 | 33 | 3.85 |
| TSS | 0.000764959 | 0.025224811 | 0.03032567 | 0.976001727 | Delete | 2 | 33 | 6.513 |
| Turbidity | -0.002418818 | 0.013637385 | -0.177366715 | 0.860374198 | Delete | 1 | 80 | 19.647 |
| EC | 0.001225686 | 0.000740476 | 1.655268143 | 0.107960755 | Delete | 1050 | 2350 | 367.959 |
| pH | 0.791445227 | 0.759759185 | 1.041705375 | 0.305604664 | Delete | 7.47 | 8.3 | 0.232 |

**Table S33** the results of multivariate linear regression of re-aeration coefficient Langbein and Durum relationship and ten independent variables with spring and summer season data after removing LEPs

| R2 | 0.92 |
| --- | --- |
| sig | 3.52569E-22 |
|  | Coefficient | standard error | T Student | Error probability coefficient | Checking the probability of error | Minimum amount of data | Maximum amount of data | standard deviation |
| constant | 1.321472833 | 0.447831308 | 2.950827265 | 0.005338529 |  |  |  |  |
| Re | -0.006678234 | 0.000687104 | -9.719389858 | 5.69372E-12 | OK | 89.558 | 932.857 | 211.841 |
| Fr | 31.4903555 | 1.554469742 | 20.25794047 | 2.64271E-22 | OK | 0.067 | 0.456 | 0.094 |

### **Table S34** results of multivariate linear regression of re-aeration coefficient of Ice and Brown relationship and ten independent variables with autumn and winter season data

| R2 | 0.96 |
| --- | --- |
| sig | 9.32585E-15 |
|  | Coefficient | standard error | T Student | Error probability coefficient | Checking the probability of error | Minimum amount of data | Maximum amount of data | standard deviation |
| constant | 6.834605559 | 18.96120397 | 0.360452088 | 0.721662131 |  |  |  |  |
| Q | 0.002706173 | 0.002518772 | 1.074401774 | 0.293326293 | Delete | 543.846 | 1716.293 | 320.731 |
| A | -0.002540859 | 0.003279286 | -0.774820652 | 0.446012772 | Delete | 209.898 | 1079.629 | 251.95 |
| S | 2161.278808 | 232.430375 | 9.298607412 | 1.99461E-09 | OK | 0.0001 | 0.005 | 0.002 |
| Re | -0.009316583 | 0.004041694 | -2.305118528 | 0.030116136 | OK | 78.425 | 905.834 | 201.98 |
| Fr | 32.21043125 | 3.829976695 | 8.410085443 | 1.28812E-08 | OK | 0.083 | 0.842 | 0.156 |
| T | -0.063269335 | 2.427732976 | -3.722593149 | 0.619571731 | Delete | 12.8 | 26.3 | 4.5 |
| TSS | -0.079063312 | 191.3339414 | 12.43569096 | 0.067169276 | Delete | 6 | 39 | 9.302 |
| Turbidity | -0.054075485 | 0.001630669 | -3.218000574 | 0.042027604 | OK | 2 | 105 | 17.82 |
| EC | 0.00644185 | 2.486124057 | 12.46881684 | 0.000303513 | OK | 940 | 25.3 | 329.566 |
| pH | -1.990538385 | 0.021138508 | -2.512590085 | 0.447913154 | Delete | 7.58 | 8.3 | 0.162 |

### **Table S35** the results of multivariate linear regression of the re-aeration coefficient of Ice and Brown relationship and ten independent variables with autumn and winter season data after removing low-effect data

| R2 | 0.95 |
| --- | --- |
| sig | 3.99093E-18 |
|  | Coefficient | standard error | T Student | Error probability coefficient | Checking the probability of error | Minimum amount of data | Maximum amount of data | standard deviation |
| constant | -9.037462143 | 2.427732976 | -3.722593149 | 0.000844926 |  |  |  |  |
| S | 2379.369766 | 191.3339414 | 12.43569096 | 3.791E-13 | OK | 0.0001 | 0.005 | 0.002 |
| Re | -0.005247493 | 0.001630669 | -3.218000574 | 0.003169169 | OK | 78.425 | 905.834 | 201.98 |
| Fr | 30.9990255 | 2.486124057 | 12.46881684 | 3.55107E-13 | OK | 0.083 | 0.842 | 0.156 |
| Turbidity | -0.053112406 | 0.021138508 | -2.512590085 | 0.017799329 | OK | 2 | 105 | 17.82 |
| EC | 0.004602743 | 0.001288621 | 3.571834966 | 0.001261457 | OK | 940 | 25.3 | 329.566 |

### **Table S36** the results of multivariate linear regression of re-aeration coefficient of ice and brown relationship and ten independent variables with spring and summer season data

| R2 | 0.97 |
| --- | --- |
| sig | 6.84205E-20 |
|  | Coefficient | standard error | T Student | Error probability coefficient | Checking the probability of error | Minimum amount of data | Maximum amount of data | standard deviation |
| constant | -14.77502998 | 8.23568059 | -1.794026592 | 0.082568452 |  |  |  |  |
| Q | 0.001990789 | 0.001573055 | 1.265556023 | 0.215101622 | Delete | 607.412 | 1560.908 | 267.189 |
| A | -0.00561608 | 0.001297853 | -4.327209296 | 0.000146014 | OK | 229.273 | 1721.164 | 329.721 |
| S | 2041.787261 | 162.8239656 | 12.53984481 | 1.11447E-13 | OK | 0.0001 | 0.005 | 0.002 |
| Re | -0.005257821 | 0.002136777 | -2.460631847 | 0.019641197 | OK | 89.558 | 932.857 | 211.841 |
| Fr | 18.46743736 | 3.946159913 | 4.679850227 | 5.36572E-05 | OK | 0.067 | 0.456 | 0.094 |
| T | 0.078149903 | 0.071683135 | 1.090213237 | 0.284021318 | Delete | 18 | 33 | 3.85 |
| TSS | -0.000582184 | 0.028708394 | -0.02027921 | 0.983950607 | Delete | 2 | 33 | 6.513 |
| Turbidity | -0.005065685 | 1.770664514 | 0.029498919 | 0.74632874 | Delete | 1 | 80 | 19.647 |
| EC | 0.002601394 | 0.001045152 | -4.662599357 | 0.0042385 | OK | 1050 | 2350 | 367.959 |
| pH | 1.448032488 | 112.5796979 | 19.91889284 | 0.104066029 | Delete | 7.47 | 8.3 | 0.232 |

### **Table S37** the results of multivariate linear regression of the re-aeration coefficient of Ice and Brown relationship and ten independent variables with the data of spring and summer season after removing the less effective data

| R2 | 0.96 |
| --- | --- |
| sig | 2.58409E-24 |
|  | Coefficient | standard error | T Student | Error probability coefficient | Checking the probability of error | Minimum amount of data | Maximum amount of data | standard deviation |
| constant | 0.052232689 | 1.770664514 | 0.029498919 | 0.976629614 |  |  |  |  |
| A | -0.004873123 | 0.001045152 | -4.662599357 | 4.1926E-05 | OK | 229.273 | 1721.164 | 329.721 |
| S | 2242.462938 | 112.5796979 | 19.91889284 | 5.00676E-21 | OK | 0.0001 | 0.005 | 0.002 |
| Re | -0.00248968 | 0.001042423 | -2.38835785 | 0.02229126 | OK | 89.558 | 932.857 | 211.841 |
| Fr | 15.84135179 | 3.498000765 | 4.528687343 | 6.2799E-05 | OK | 0.067 | 0.456 | 0.094 |
| EC | 0.001835522 | 0.000654785 | 2.803243351 | 0.008098716 | OK | 1050 | 2350 | 367.959 |

**Table S38** the results of multivariate linear regression of re-aeration coefficient of Cadwallader and McDonnell relationship and ten independent variables with autumn and winter season data

| R2 | 0.94 |
| --- | --- |
| sig | 3.94062E-12 |
|  | Coefficient | standard error | T Student | Error probability coefficient | Checking the probability of error | Minimum amount of data | Maximum amount of data | standard deviation |
| constant | 16.46539854 | 41.94022277 | 0.392592062 | 0.698085941 |  |  |  |  |
| Q | 0.006333826 | 0.005571262 | 1.136874385 | 0.266814966 | Delete | 543.846 | 1716.293 | 320.731 |
| A | -0.003177688 | 0.007253442 | -0.438093752 | 0.665236163 | Delete | 209.898 | 1079.629 | 251.95 |
| S | 2692.036919 | 514.1119583 | 5.236285357 | 2.28719E-05 | OK | 0.0001 | 0.005 | 0.002 |
| Re | -0.026013436 | 0.008939808 | -2.90984267 | 0.007680328 | OK | 78.425 | 905.834 | 201.98 |
| Fr | 61.84824486 | 8.471512463 | 7.300732322 | 1.53154E-07 | OK | 0.083 | 0.842 | 0.156 |
| T | -0.004471857 | 0.278239056 | -0.016071998 | 0.987309818 | Delete | 12.8 | 26.3 | 4.5 |
| TSS | -0.135066321 | 0.091208424 | -1.480853572 | 0.151655545 | Delete | 6 | 39 | 9.302 |
| Turbidity | -0.118097871 | 0.05568659 | -2.120759596 | 0.044469123 | OK | 2 | 105 | 17.82 |
| EC | 0.013385468 | 0.003378265 | 3.962231279 | 0.000579642 | OK | 940 | 25.3 | 329.566 |
| pH | -4.732339587 | 5.706539258 | -0.829283629 | 0.415116206 | Delete | 7.58 | 8.3 | 0.162 |

**Table S39** the results of multivariate linear regression of re-aeration coefficient of Cadwallader and McDonnell relationship and ten independent variables with fall and winter season data after removing low effective data

| R2 | 0.92 |
| --- | --- |
| sig | 3.92938E-15 |
|  | Coefficient | standard error | T Student | Error probability coefficient | Checking the probability of error | Minimum amount of data | Maximum amount of data | standard deviation |
| constant | -18.91935912 | 5.281093623 | -3.582469933 | 0.001226471 |  |  |  |  |
| S | 3245.707766 | 416.2123544 | 7.798201403 | 1.33857E-08 | OK | 0.0001 | 0.005 | 0.002 |
| Re | -0.014517731 | 0.003547225 | -4.092701255 | 0.000310861 | OK | 78.425 | 905.834 | 201.98 |
| Fr | 57.00563435 | 5.408112849 | 10.54076273 | 1.97171E-11 | OK | 0.083 | 0.842 | 0.156 |
| Turbidity | -0.10227551 | 0.045982998 | -2.224202749 | 0.034080299 | OK | 2 | 105 | 17.82 |
| EC | 0.010484934 | 0.002803163 | 3.740394182 | 0.000805649 | OK | 940 | 25.3 | 329.566 |

**Table S40** results of multivariate linear regression of re-aeration coefficient of Cadwallader and McDonnell relationship and ten independent variables with spring and summer season data

| R2 | 0.92 |
| --- | --- |
| sig | 1.6628E-14 |
|  | Coefficient | standard error | T Student | Error probability coefficient | Checking the probability of error | Minimum amount of data | Maximum amount of data | standard deviation |
| constant | -27.05181099 | 18.81848801 | -1.43751246 | 0.16059065 |  |  |  |  |
| Q | 0.003314678 | 0.003594422 | 0.92217273 | 0.363560353 | Delete | 607.412 | 1560.908 | 267.189 |
| A | -0.009375735 | 0.002965586 | -3.16151128 | 0.003496995 | OK | 229.273 | 1721.164 | 329.721 |
| S | 2602.911413 | 372.0519283 | 6.99609709 | 7.48371E-08 | OK | 0.0001 | 0.005 | 0.002 |
| Re | -0.012556343 | 0.004882524 | -2.571691215 | 0.015137544 | OK | 89.558 | 932.857 | 211.841 |
| Fr | 27.0913031 | 9.016955207 | 3.004484604 | 0.005228953 | OK | 0.067 | 0.456 | 0.094 |
| T | 0.096291985 | 0.163795597 | 0.587878958 | 0.560872056 | Delete | 18 | 33 | 3.85 |
| TSS | 0.004115288 | 0.065598533 | 0.062734454 | 0.950380721 | Delete | 2 | 33 | 6.513 |
| Turbidity | -0.011780314 | 0.035464785 | -0.332169342 | 0.741996997 | Delete | 1 | 80 | 19.647 |
| EC | 0.004897285 | 0.00192565 | 2.543185928 | 0.016192449 | OK | 1050 | 2350 | 367.959 |
| pH | 2.949153646 | 1.975796309 | 1.492640528 | 0.145639666 | Delete | 7.47 | 8.3 | 0.232 |

**Table S41** results of multivariate linear regression of re-aeration coefficient of Cadwallader and McDonnell relationship and ten independent variables with spring and summer season data after removing low effective data

| R2 | 0.92 |
| --- | --- |
| Sig | 2.46501E-18 |
|  | Coefficient | standard error | T Student | Error probability coefficient | Checking the probability of error | Minimum amount of data | Maximum amount of data | standard deviation |
| constant | 1.459351161 | 3.96136145 | 0.368396366 | 0.714735255 |  |  |  |  |
| A | -0.008140295 | 0.002338231 | -3.481390229 | 0.001326031 | OK | 229.273 | 1721.164 | 329.721 |
| S | 2923.420979 | 251.8652584 | 11.60708308 | 1.00304E-13 | OK | 0.0001 | 0.005 | 0.002 |
| Re | -0.008128368 | 0.002332127 | -3.485387969 | 0.001311342 | OK | 89.558 | 932.857 | 211.841 |
| Fr | 23.07475058 | 7.825788156 | 2.948552928 | 0.005577271 | OK | 0.067 | 0.456 | 0.094 |
| EC | 0.003313704 | 0.001464896 | 2.262074017 | 0.029827069 | OK | 1050 | 2350 | 367.959 |

**Table S42** results of multivariate linear regression of re-aeration coefficient of Dobbins relationship and ten independent variables with autumn and winter season data

| R2 | 0.81 |
| --- | --- |
| sig | 1.6749E-06 |
|  | Coefficient | standard error | T Student | Error probability coefficient | Checking the probability of error | Minimum amount of data | Maximum amount of data | standard deviation |
| constant | 75.03362638 | 154.9289299 | 0.484309976 | 0.632556306 |  |  |  |  |
| Q | 0.030971204 | 0.020580476 | 1.504882818 | 0.145402225 | Delete | 543.846 | 1716.293 | 320.731 |
| A | -0.06458535 | 0.026794518 | -2.410394135 | 0.023957955 | OK | 209.898 | 1079.629 | 251.95 |
| S | 527.8121355 | 1899.150989 | 0.277920049 | 0.783453935 | Delete | 0.0001 | 0.005 | 0.002 |
| Re | -0.151869025 | 0.033024024 | -4.598743754 | 0.000115205 | OK | 78.425 | 905.834 | 201.98 |
| Fr | 9.918659308 | 31.29411991 | 0.316949617 | 0.754022508 | Delete | 0.083 | 0.842 | 0.156 |
| T | 1.902721821 | 1.027826663 | 1.851208856 | 0.076484271 | Delete | 12.8 | 26.3 | 4.5 |
| TSS | -0.013984734 | 0.336927719 | -0.04150663 | 0.967235385 | Delete | 6 | 39 | 9.302 |
| Turbidity | -0.126795036 | 0.205708584 | -0.61638184 | 0.543445379 | Delete | 2 | 105 | 17.82 |
| EC | 0.029653247 | 0.012479452 | 2.376165796 | 0.025819983 | OK | 940 | 25.3 | 329.566 |
| pH | -5.282290421 | 21.08019372 | -0.250580734 | 0.804271037 | Delete | 7.58 | 8.3 | 0.162 |

### **Table S43** results of multivariate linear regression of re-aeration coefficient of Dobbins relationship and ten independent variables with autumn and winter season data after removing low effect data

| R2 | 0.72 |
| --- | --- |
| sig | 7.78007E-09 |
|  | Coefficient | standard error | T Student | Error probability coefficient | Checking the probability of error | Minimum amount of data | Maximum amount of data | standard deviation |
| constant | 66.74388744 | 14.27137623 | 4.67676602 | 5.41312E-05 |  |  |  |  |
| A | -0.040210052 | 0.013536532 | -2.970484046 | 0.005698731 | OK | 209.898 | 1079.629 | 251.95 |
| Re | -0.092471388 | 0.01305603 | -7.082657698 | 5.89398E-08 | OK | 78.425 | 905.834 | 201.98 |
| EC | 0.027640192 | 0.010490961 | 2.634667426 | 0.013028156 | OK | 940 | 25.3 | 329.566 |

### **Table S44** results of multivariate linear regression of re-aeration coefficient of Dobbins relationship and ten independent variables with spring and summer season data

| R2 | 0.85 |
| --- | --- |
| sig | 5.43844E-10 |
|  | Coefficient | standard error | T Student | Error probability coefficient | Checking the probability of error | Minimum amount of data | Maximum amount of data | standard deviation |
| constant | -102.8313403 | 72.77593184 | -1.412985553 | 0.167622373 |  |  |  |  |
| Q | 0.016731803 | 0.013900554 | 1.203678872 | 0.237825007 | Delete | 607.412 | 1560.908 | 267.189 |
| A | -0.024883559 | 0.011468685 | -2.16969594 | 0.037813915 | OK | 229.273 | 1721.164 | 329.721 |
| S | 248.5127177 | 1438.820471 | 0.172719754 | 0.863994479 | Delete | 0.0001 | 0.005 | 0.002 |
| Re | -0.085870325 | 0.018881974 | -4.547740759 | 7.81661E-05 | OK | 89.558 | 932.857 | 211.841 |
| Fr | 56.11219179 | 34.87088428 | 1.609141636 | 0.117723393 | OK | 0.067 | 0.456 | 0.094 |
| T | 0.365433222 | 0.63343969 | 0.576902943 | 0.568171113 | Delete | 18 | 33 | 3.85 |
| ابتSS | 0.034747424 | 0.253686393 | 0.136969997 | 0.891940228 | Delete | 2 | 33 | 6.513 |
| Turbidity | -0.040681578 | 0.137151441 | -0.296617943 | 0.768736499 | Delete | 1 | 80 | 19.647 |
| EC | 0.026654883 | 0.007446982 | 3.579286657 | 0.001157817 | OK | 1050 | 2350 | 367.959 |
| pH | 15.83080631 | 7.640912356 | 2.071847651 | 0.046687452 | Delete | 7.47 | 8.3 | 0.232 |

**Table S45** results of multivariate linear regression of re-aeration coefficient of Dobbins relationship and ten independent variables with spring and summer data after removing low effect data

| R2 | 0.82 |
| --- | --- |
| sig | 3.81938E-13 |
|  | Coefficient | standard error | T Student | Error probability coefficient | Checking the probability of error | Minimum amount of data | Maximum amount of data | standard deviation |
| constant | -57.656337 | 56.75796548 | -1.015828113 | 0.316308139 |  |  |  |  |
| A | -0.02828213 | 0.005823424 | -4.856615569 | 2.19511E-05 | OK | 229.273 | 1721.164 | 329.721 |
| Re | -0.071439301 | 0.008028231 | -8.89851126 | 9.99207E-11 | OK | 89.558 | 932.857 | 211.841 |
| Fr | 0.021647418 | 0.006213456 | 3.483957691 | 0.001287836 | OK | 0.067 | 0.456 | 0.094 |
| EC | 15.46622608 | 6.746278236 | 2.292556806 | 0.027657849 | OK | 1050 | 2350 | 367.959 |

**Table S46** results of linear regression of re-aeration coefficient of Langbein and Durumrelationship and common data as independent variable

| R2 | 0.08 |
| --- | --- |
| sig | 0.014041433 |
|  | Coefficient | standard error | T Student | Error probability coefficient | Checking the probability of error | Minimum amount of data | Maximum amount of data | standard deviation |
| constant | 13.16590441 | 2.861133607 | 4.601639146 | 1.67267E-05 |  |  |  |  |
| EC | -0.004675323 | 0.001858912 | -2.515085156 | 0.014041433 | OK | 940 | 2530 | 348.761 |

**Table S47** results from the linear regression of the re-aeration coefficient of Ice and Brown relationship and common data as independent variables

| R2 | 0.82 |
| --- | --- |
| sig | 8.32362E-27 |
|  | Coefficient | standard error | T Student | Error probability coefficient | Checking the probability of error | Minimum amount of data | Maximum amount of data | standard deviation |
| constant | 4.748218401 | 1.398757118 | 3.394598205 | 0.001114297 |  |  |  |  |
| A | -0.011513004 | 0.001318336 | -8.732983193 | 5.90263E-13 | OK | 209.898 | 1721.164 | 298.098 |
| S | 2858.352338 | 179.0822612 | 15.96111373 | 1.64244E-25 | OK | 0.0001 | 0.005 | 0.002 |
| EC | 0.00220995 | 0.001135665 | 1.945952104 | 0.055510248 | OK | 940 | 2530 | 348.761 |

**Table S48** results from the linear regression of the re-aeration coefficient of Ice and Brown relationship and common data as independent variables

| R2 | 0.5 |
| --- | --- |
| sig | 6.4777E-12 |
|  | Coefficient | standard error | T Student | Error probability coefficient | Checking the probability of error | Minimum amount of data | Maximum amount of data | standard deviation |
| constant | 7.792463773 | 3.727050805 | 2.090785498 | 0.039981329 |  |  |  |  |
| S | 4177.138216 | 484.6327959 | 8.619181887 | 8.72626E-13 | OK | 0.0001 | 0.005 | 0.002 |
| EC | -0.004892431 | 0.002434616 | -2.009529008 | 0.048127842 | OK | 940 | 2530 | 348.761 |

| Table 1 Initial calculations | | | | | | | | | |
| --- | --- | --- | --- | --- | --- | --- | --- | --- | --- |
| Station | UTM | Time | Re | Fr | WQI(Eq.9) | K2 (Eq.5) | K2 (Eq.6) | K2 (Eq.7) | K2 (Eq.8) |
| P1 | 234505, 39S 3570633 | January | 283 | 0.29 | 13.02 | 8.10 | 2.16 | 2.90 | 53.04 |
| February | 283 | 0.29 | 21.34 | 8.31 | 2.19 | 2.93 | 51.86 |
| March | 231 | 0.30 | 15.34 | 9.27 | 2.32 | 3.26 | 60.83 |
| April | 417 | 0.25 | 13.22 | 5.25 | 1.74 | 2.09 | 39.92 |
| May | 660 | 0.17 | 12.50 | 2.24 | 1.14 | 1.14 | 25.96 |
| Juan | 513 | 0.19 | 14.26 | 5.05 | 1.71 | 2.11 | 45.25 |
| July | 352 | 0.22 | 14.04 | 3.23 | 1.37 | 1.50 | 33.39 |
| August | 544 | 0.19 | 14.75 | 2.69 | 1.25 | 1.30 | 29.16 |
| September | 653 | 0.18 | 14.16 | 2.33 | 1.16 | 1.17 | 26.23 |
| October | 693 | 0.17 | 15.62 | 1.93 | 1.05 | 1.08 | 29.49 |
| November | 471 | 0.13 | 15.62 | 1.93 | 1.05 | 1.08 | 29.49 |
|  |  |  |  |  |  |  |  |
| P2 | 234607, 39S 3570210 | January | 453 | 0.45 | 12.27 | 12.08 | 8.36 | 11.03 | 42.71 |
| February | 418 | 0.27 | 17.96 | 5.76 | 5.77 | 6.94 | 39.52 |
| March | 478 | 0.57 | 14.22 | 17.30 | 10.01 | 13.87 | 44.31 |
| April | 463 | 0.46 | 13.80 | 12.76 | 8.59 | 11.56 | 45.20 |
| May | 933 | 0.31 | 14.71 | 5.08 | 5.42 | 5.85 | 27.21 |
| Juan | 795 | 0.27 | 13.46 | 4.38 | 5.03 | 5.40 | 28.11 |
| July | 487 | 0.36 | 16.37 | 9.16 | 7.28 | 9.40 | 43.96 |
| August | 729 | 0.36 | 14.27 | 7.55 | 6.61 | 7.88 | 34.61 |
| September | 855 | 0.34 | 18.97 | 6.27 | 6.02 | 6.87 | 31.24 |
| October | 906 | 0.32 | 12.99 | 5.41 | 5.59 | 6.12 | 28.09 |
| November | 693 | 0.31 | 17.67 | 5.86 | 5.82 | 6.64 | 32.19 |
|  |  |  |  |  |  |  |  |
| P3 | 240109, 39R 3534918 | January | 258 | 0.34 | 12.98 | 10.55 | 17.47 | 24.50 | 58.21 |
| February | 181 | 0.40 | 13.29 | 16.34 | 21.76 | 34.24 | 77.67 |
| March | 293 | 0.84 | 14.02 | 40.87 | 34.42 | 57.80 | 69.05 |
| April | 194 | 0.32 | 17.09 | 12.43 | 18.97 | 29.10 | 77.76 |
| May | 409 | 0.21 | 13.00 | 4.19 | 11.00 | 13.04 | 41.18 |
| Juan | 257 | 0.24 | 14.03 | 7.50 | 14.73 | 20.74 | 66.11 |
| July | 258 | 0.29 | 13.00 | 10.24 | 17.22 | 25.29 | 70.39 |
| August | 444 | 0.27 | 14.55 | 6.79 | 14.01 | 18.03 | 48.70 |
| September | 522 | 0.23 | 14.40 | 4.65 | 11.59 | 13.62 | 38.83 |
| October | 546 | 0.23 | 14.58 | 4.44 | 11.32 | 13.04 | 36.51 |
| November | 438 | 0.19 | 16.55 | 3.48 | 10.02 | 11.32 | 36.29 |
|  |  |  |  |  |  |  |  |
| P4 | 238733, 39R 3540373 | January | 207 | 0.49 | 14.43 | 21.32 | 22.23 | 35.65 | 74.99 |
| February | 357 | 0.36 | 14.90 | 9.62 | 14.92 | 19.74 | 47.94 |
| March | 358 | 0.28 | 14.85 | 6.36 | 12.13 | 15.11 | 43.85 |
| April | 352 | 0.36 | 12.54 | 10.44 | 15.54 | 21.29 | 53.28 |
| May | 607 | 0.27 | 14.54 | 4.98 | 10.72 | 12.29 | 34.63 |
| Juan | 365 | 0.27 | 14.78 | 7.24 | 12.94 | 17.10 | 52.66 |
| July | 397 | 0.25 | 11.21 | 6.03 | 11.81 | 14.97 | 47.57 |
| August | 546 | 0.29 | 16.50 | 6.64 | 12.39 | 15.30 | 41.83 |
| September | 569 | 0.30 | 19.41 | 6.67 | 12.42 | 15.24 | 40.87 |
| October | 537 | 0.30 | 17.90 | 6.49 | 12.25 | 14.88 | 39.71 |
| November | 636 | 0.24 | 19.45 | 3.93 | 9.53 | 10.34 | 30.28 |
|  |  |  |  |  |  |  |  |
| P5 | 258618, 39R 3518092 | January | 290 | 0.27 | 14.06 | 6.99 | 11.02 | 14.35 | 50.32 |
| February | 310 | 0.11 | 17.93 | 1.61 | 5.29 | 5.54 | 32.51 |
| March | 375 | 0.08 | 17.99 | 0.96 | 4.08 | 3.85 | 24.73 |
| April | 408 | 0.23 | 21.42 | 4.93 | 9.24 | 11.16 | 42.16 |
| May | 657 | 0.09 | 16.90 | 0.86 | 3.85 | 3.39 | 19.83 |
| Juan | 577 | 0.11 | 17.62 | 1.33 | 4.80 | 4.66 | 25.94 |
| July | 770 | 0.10 | 18.52 | 0.95 | 4.04 | 3.59 | 20.08 |
| August | 559 | 0.10 | 22.79 | 1.35 | 4.83 | 4.77 | 27.45 |
| September | 554 | 0.10 | 19.67 | 1.15 | 4.45 | 4.26 | 25.13 |
| October | 523 | 0.10 | 19.04 | 1.18 | 4.52 | 4.33 | 25.16 |
| November | 692 | 0.17 | 18.06 | 2.20 | 6.17 | 6.08 | 24.81 |
|  |  |  |  |  |  |  |  |  |  |
| P6 | 258344, 39R 3515753 | January | 290 | 0.27 | 13.63 | 2.01 | 3.41 | 3.51 | 29.40 |
| February | 338 | 0.12 | 16.57 | 1.74 | 3.17 | 3.32 | 31.97 |
| March | 358 | 0.14 | 17.88 | 2.33 | 3.67 | 3.97 | 34.05 |
| April | 342 | 0.20 | 19.15 | 4.44 | 5.07 | 6.18 | 44.96 |
| May | 513 | 0.15 | 17.04 | 2.30 | 3.64 | 3.85 | 31.29 |
| Juan | 427 | 0.18 | 17.42 | 3.66 | 4.60 | 5.41 | 41.17 |
| July | 713 | 0.12 | 22.48 | 1.50 | 2.94 | 2.83 | 24.54 |
| August | 583 | 0.15 | 21.37 | 2.41 | 3.73 | 3.99 | 32.53 |
| September | 571 | 0.15 | 23.09 | 2.34 | 3.67 | 3.88 | 31.35 |
| October | 586 | 0.14 | 15.99 | 1.88 | 3.29 | 3.32 | 27.68 |
| November | 521 | 0.16 | 19.20 | 2.23 | 3.58 | 3.69 | 28.75 |
|  |  |  |  |  |  |  |  |
| P7 | 238564, 39R 3540457 | January | 79 | 0.27 | 14.42 | 14.54 | 18.37 | 32.07 | 121.10 |
| February | 86 | 0.24 | 18.48 | 11.70 | 16.47 | 27.65 | 111.73 |
| March | 81 | 0.23 | 17.66 | 11.42 | 16.27 | 27.53 | 115.70 |
| April | 95 | 0.22 | 22.21 | 10.31 | 15.46 | 25.63 | 110.50 |
| May | 150 | 0.13 | 19.44 | 3.66 | 9.20 | 12.57 | 70.26 |
| Juan | 90 | 0.16 | 22.66 | 6.75 | 12.51 | 19.97 | 107.08 |
| July | 118 | 0.09 | 23.43 | 2.39 | 7.44 | 9.94 | 69.26 |
| August | 174 | 0.07 | 25.67 | 1.33 | 5.53 | 6.47 | 47.95 |
| September | 129 | 0.07 | 20.83 | 1.62 | 6.12 | 7.58 | 56.90 |
| October | 78 | 0.08 | 25.15 | 2.70 | 7.90 | 11.24 | 84.18 |
| November | 95 | 0.10 | 19.72 | 2.82 | 8.08 | 11.04 | 73.08 |
